# Supplementary material
Source: PubMed Central journal article supplement (PMC2824402)
Supplement: 0912344107_pnas.200912344SI.pdf [file 0912344107_pnas.200912344SI.pdf]

# Supporting Information

Alain et al. 10.1073/pnas.0912344107

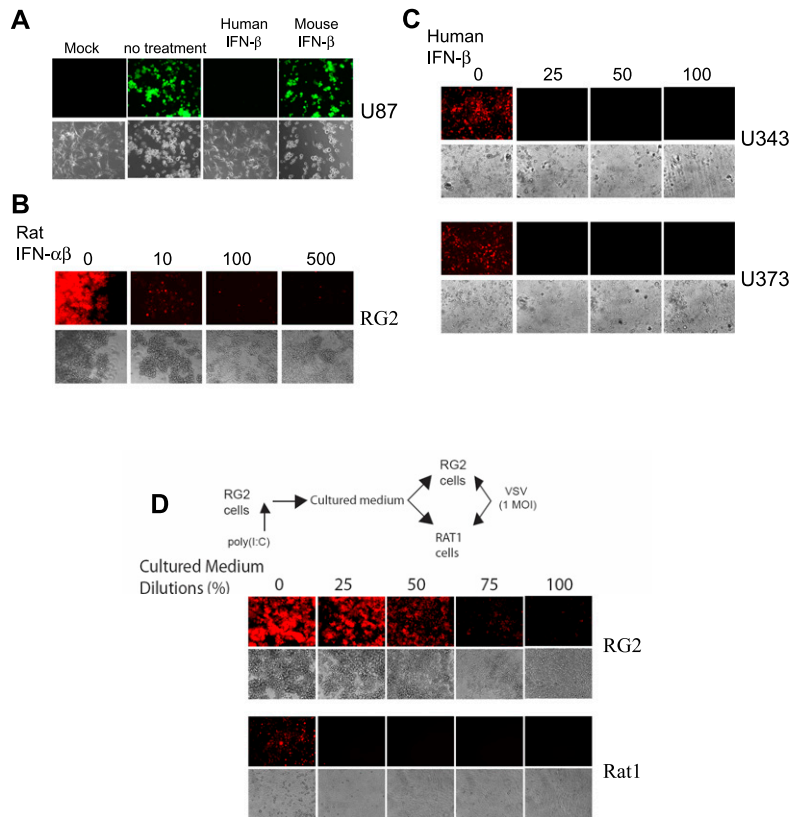

**Fig. S1.** Human and rat glioma cell lines are protected from VSV oncolysis when pretreated with type I IFN. (A) The human glioma cell line U87 was treated with 50 U of either human IFN- $\beta$  or mouse IFN- $\beta$  for 6 h before being infected with VSV $\Delta$ M51-GFP at an MOI of 1. GFP fluorescence and CPE were analyzed at 24 h after infection by phase-contrast and fluorescent microscopy. (B) The rat glioma cell line RG2 was treated with increasing units of rat IFN- $\alpha\beta$  for 6 h before being infected with VSV $\Delta$ M51-RFP at an MOI of 0.1. (C) The human glioma cell lines U343 and U373 were treated with increasing units of human IFN- $\beta$  for 6 h before being infected with VSV $\Delta$ M51-RFP at an MOI of 1. RFP fluorescence and CPE were analyzed as in A. (D) RG2 cells were transfected with poly(I:C) (1  $\mu$ g/mL) for 6 h. RG2 and Rat1 cells were then incubated with increasing amount of conditioned medium for 12 h and subsequently infected with VSV $\Delta$ M51-RFP (MOI of 1) for 24 h.



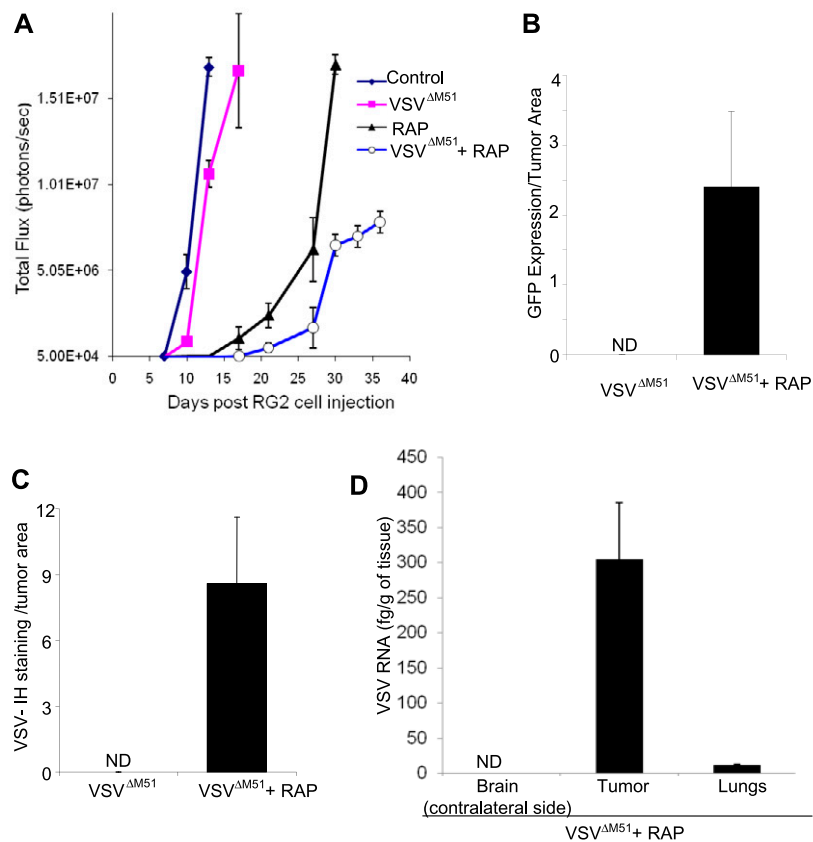

**Fig. S3.** The combination of rapamycin and VSV<sup>ΔM51</sup> reduces tumor size and specifically increases VSV<sup>ΔM51</sup> replication within the tumor. (A) Quantification of the bioluminescence imaging signal corresponding to real-time monitoring of tumor size. RG2-expressing luciferase cells were injected intracranially and treated with PBS solution (Control), VSV<sup>ΔM51</sup>, rapamycin (RAP), and VSV<sup>ΔM51</sup> plus RAP. The total photon flux emission (photons/sec) was recorded during the course of the experiment. (RAP vs. VSV<sup>ΔM51</sup> plus RAP: ANOVA,  $P < 0.05$ .) (B) The brains of VSV<sup>ΔM51</sup> and VSV<sup>ΔM51</sup> plus RAP-treated animals were imaged in situ 72 h after infection using a stereotactic microscope with a GFP filter. Two dimensional measurement of GFP expression was quantified as a percentage of the entire tumor area using ImageJ software. (C) Brains of VSV<sup>ΔM51</sup> and VSV<sup>ΔM51</sup> plus RAP-treated animals were sectioned for immunohistochemistry staining against VSV. The VSV immunohistochemistry stained area was quantified as a percentage of the tumor area using ImageJ. (D) The lungs and brains of VSV<sup>ΔM51</sup> plus RAP-treated animals 24 h after infection were cut in half and tumors were excised from the half that contained them. RNA was extracted and amplified by quantitative real-time PCR. Viral load (in fg/g of tissue) was determined using a standard curve generated with the full-length VSV-N RNA.
